# Supplementary material
Source: ML conference proceedings conference paper supplement (https://openreview.net/forum?id=1Avb4jYjLb)
Supplement: supplementary_material [file attachment]

Train: FineWeb

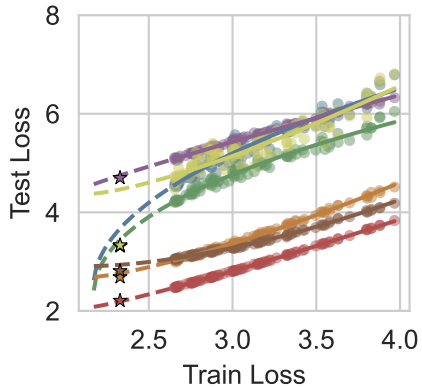

Train: FineWeb-Edu

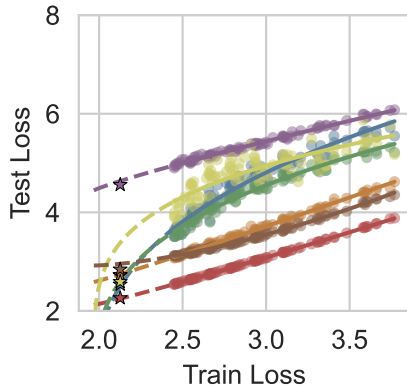

Train: ProofPile 2

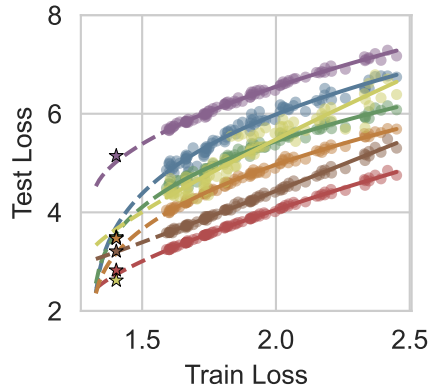

Train: SlimPajama

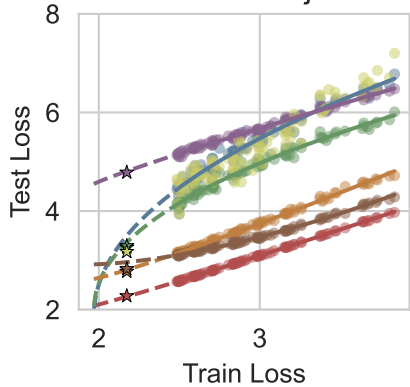

Train: SmolLM Corpus

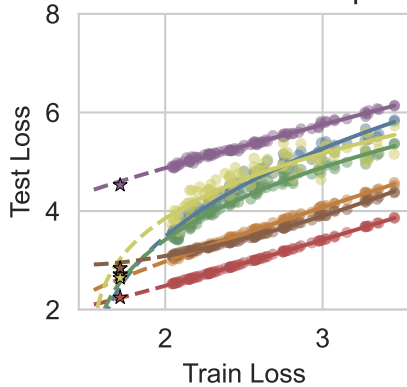

Train: StarCoder

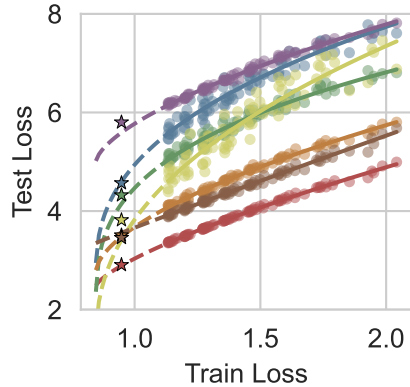

Test data

- Hellaswag
- ARC-Easy
- ARC-Challenge
- OpenBookQA
- PIQA
- SciQ
- Winogrande
