# Supplementary material
Source: ML conference proceedings conference paper supplement (https://openreview.net/forum?id=1Avb4jYjLb)

Test data: SmolLM Corpus

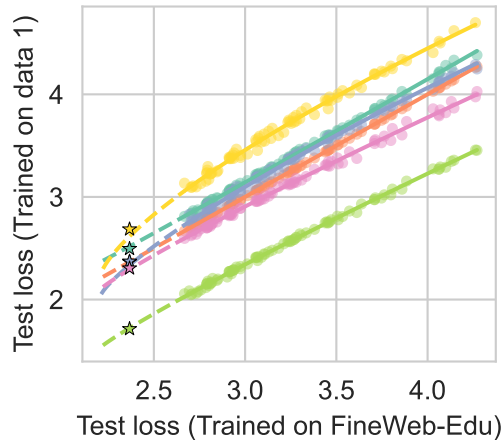

Test data: FineWeb-Edu

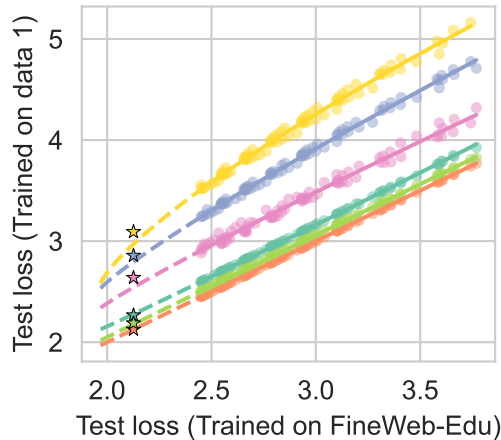

Test data: SlimPajama

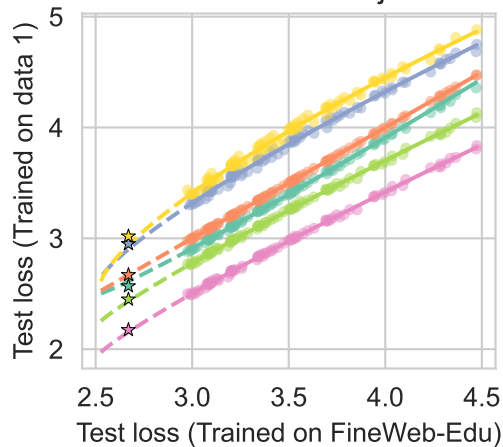

Test data: FineWeb

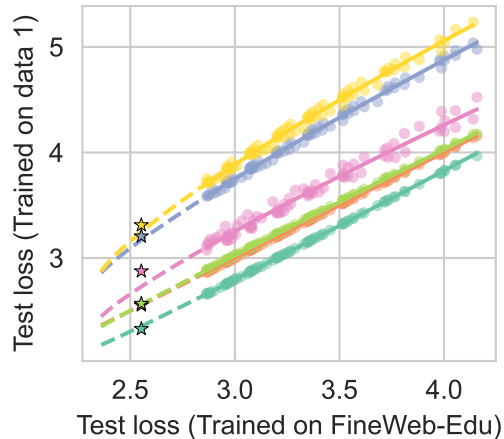

Test data: ProofPile 2

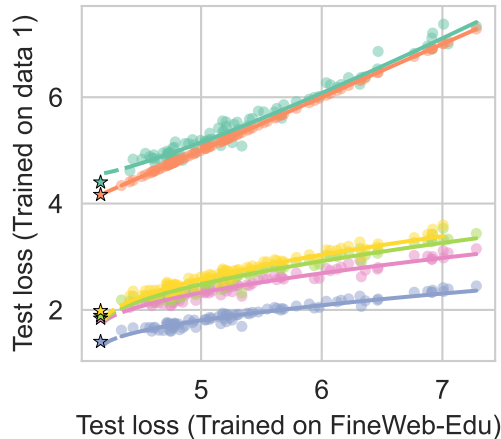

Test data: StarCoder

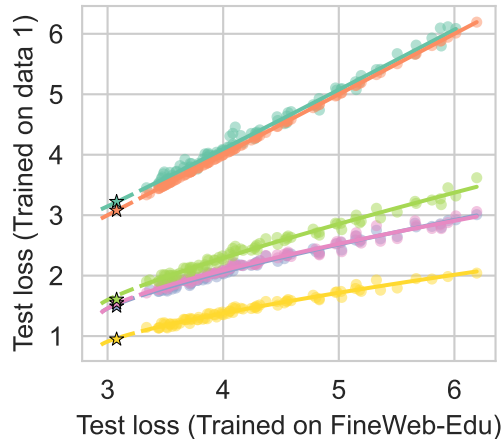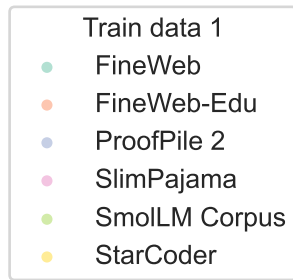

Supplement: supplementary_material [file attachment]
