# Supplementary material
Source: ML conference proceedings conference paper supplement (https://openreview.net/forum?id=1Avb4jYjLb)

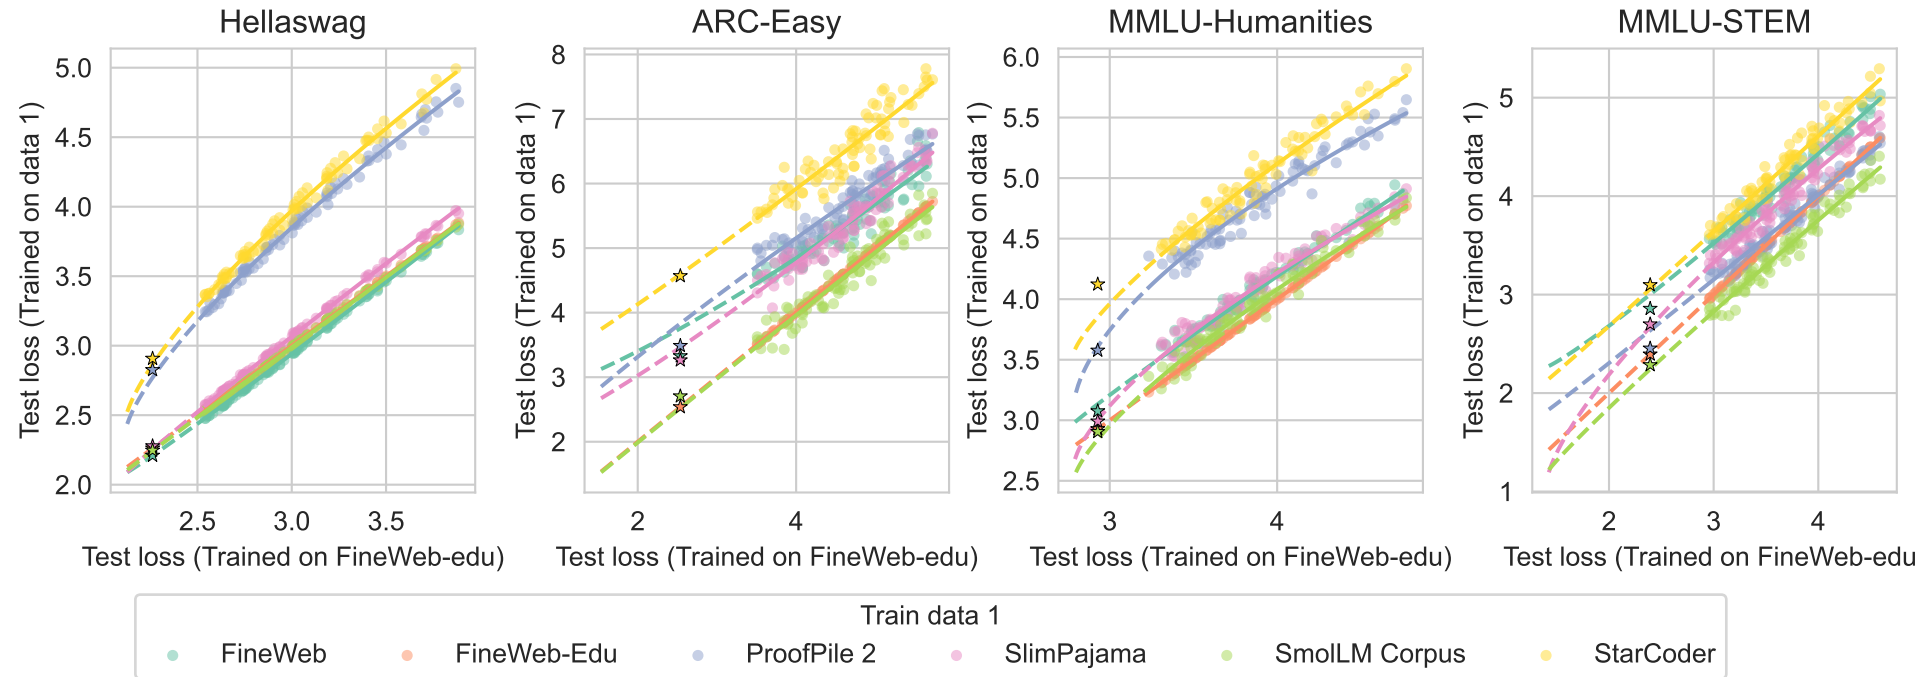

Supplement: supplementary_material [file attachment]

SmolLM Corpus

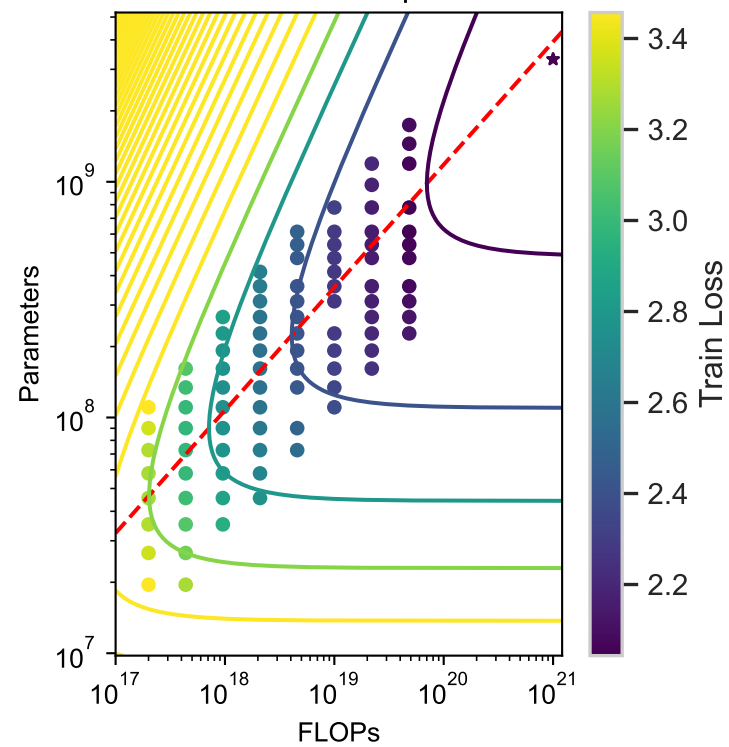

FineWeb-Edu

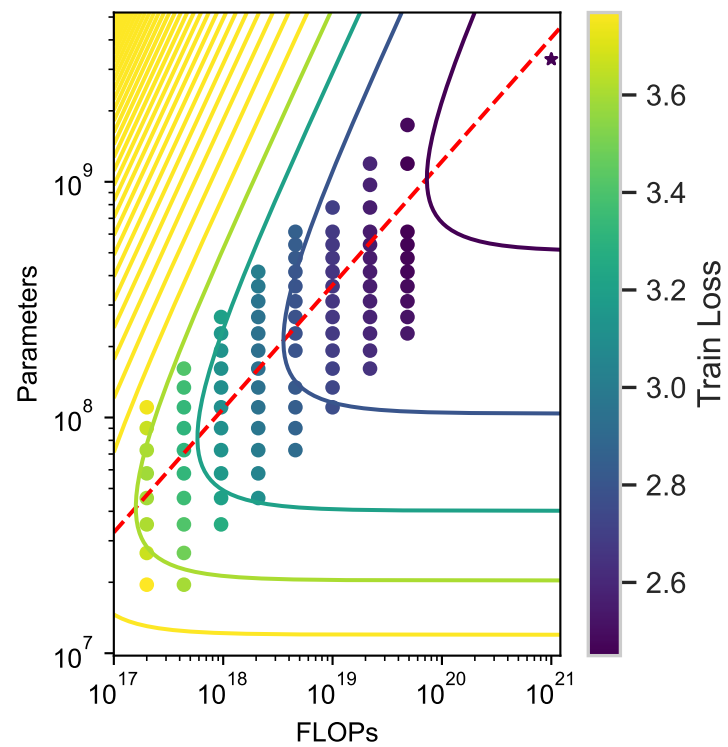

SlimPajama

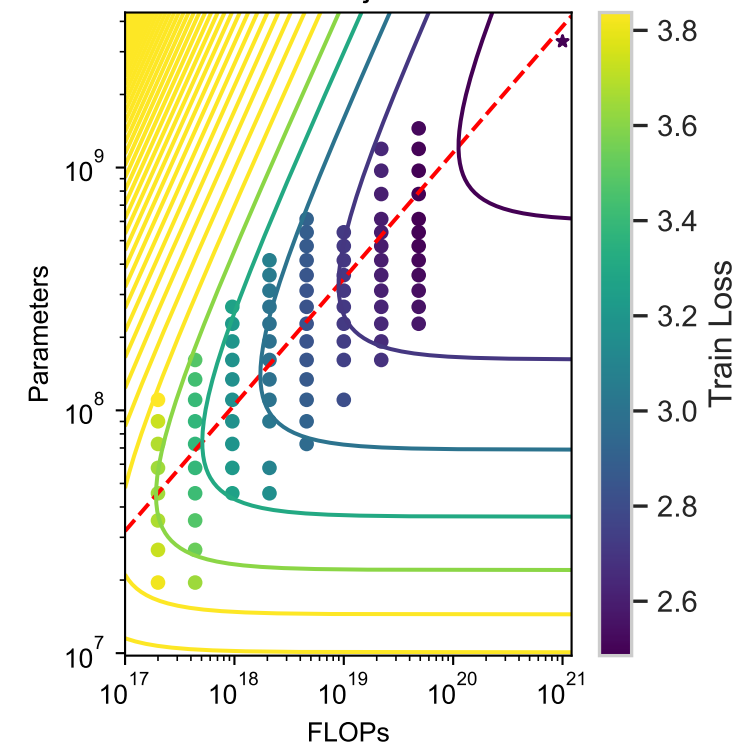

FineWeb

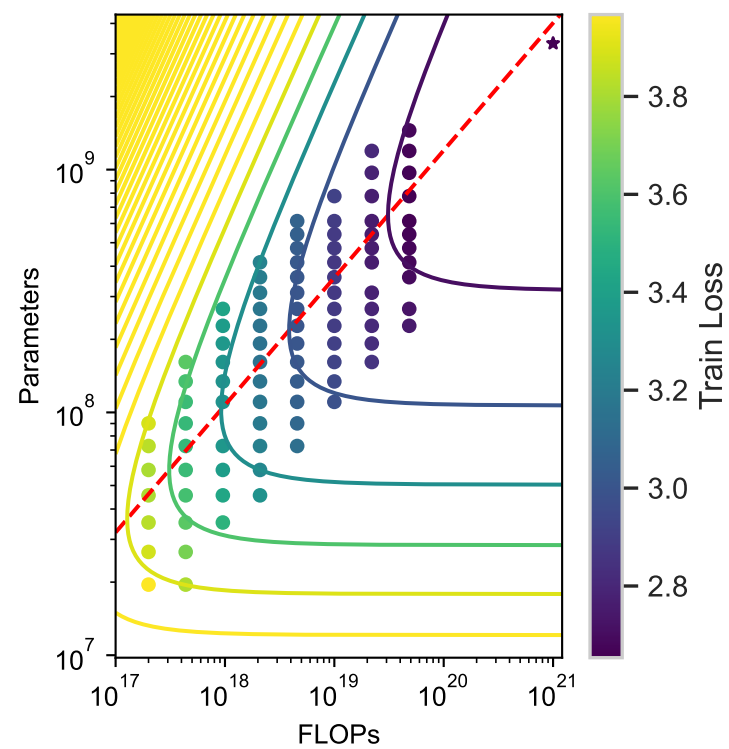

ProofPile 2

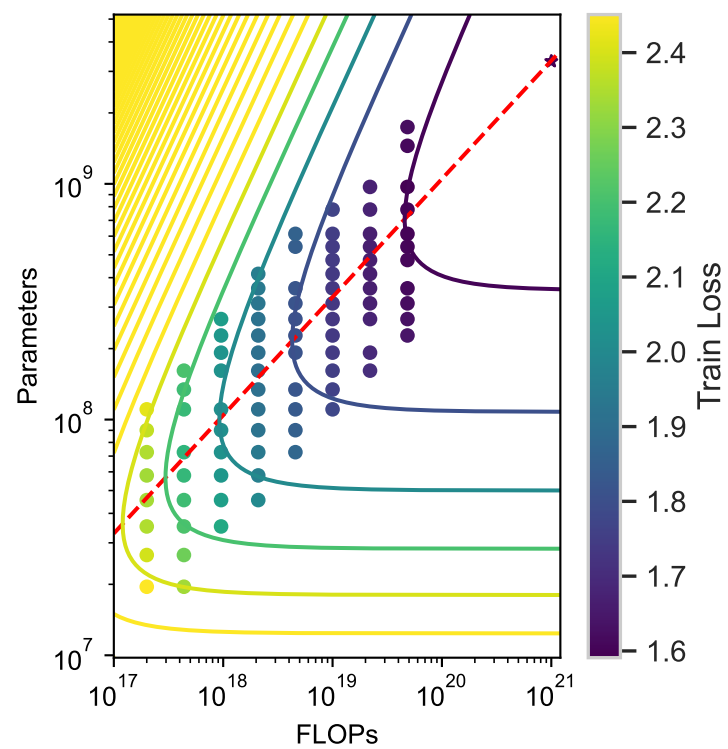

StarCoder

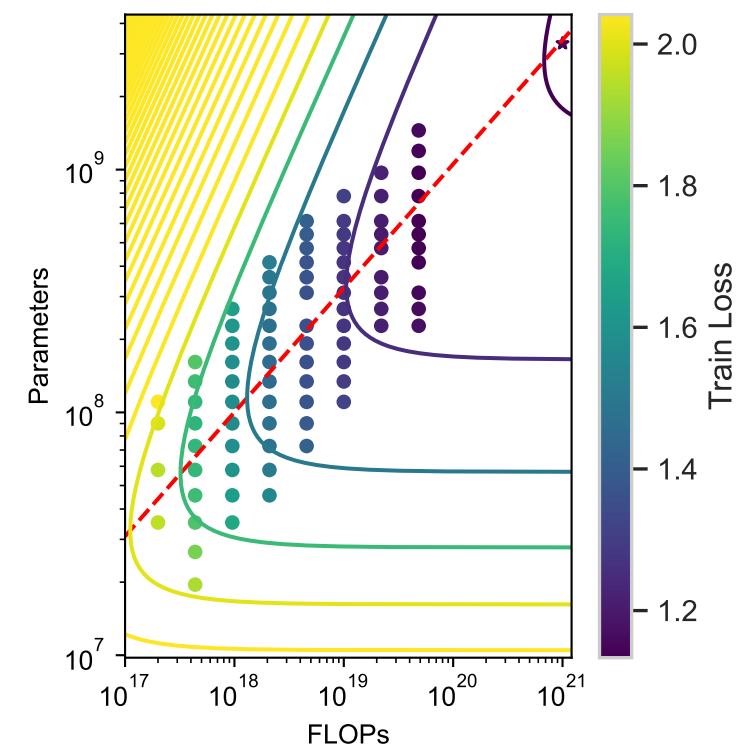

Supplement: supplementary_material [file attachment]

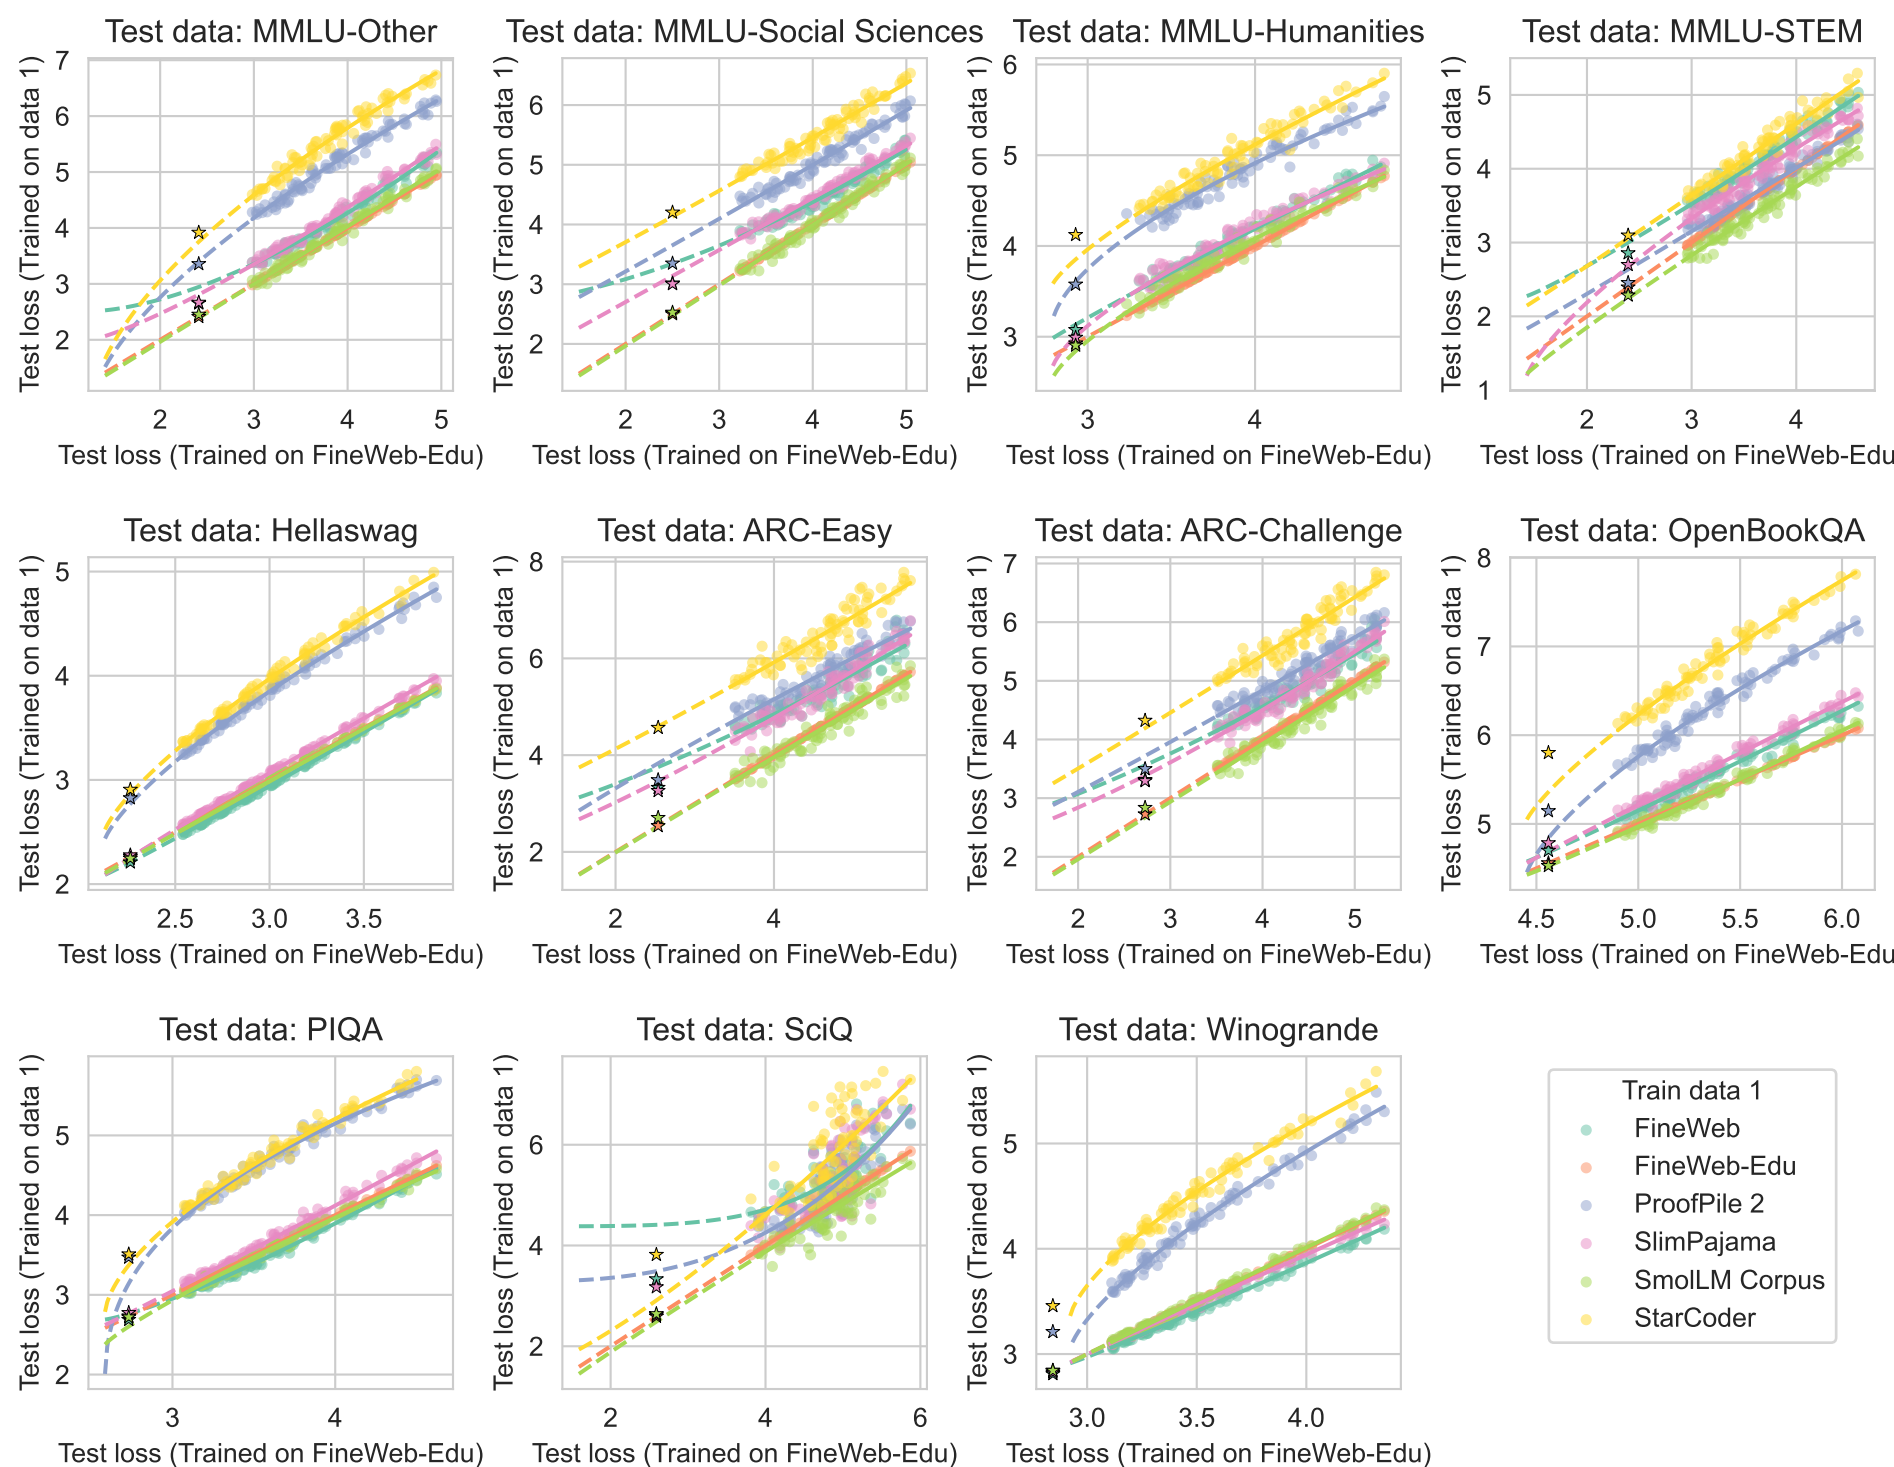

Supplement: supplementary_material [file attachment]

Arc Challenge

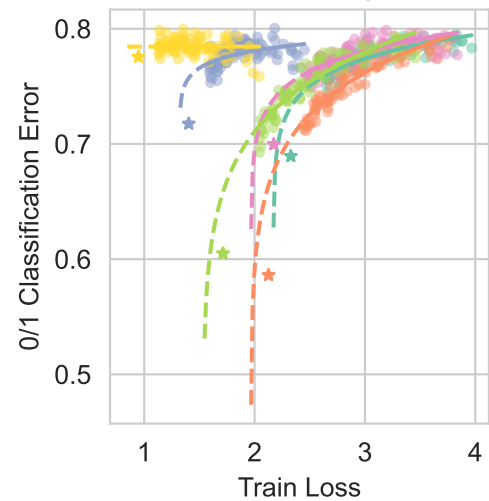

Arc Easy

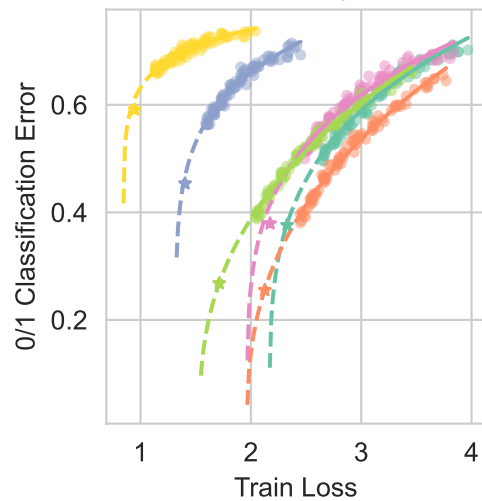

Hellaswag

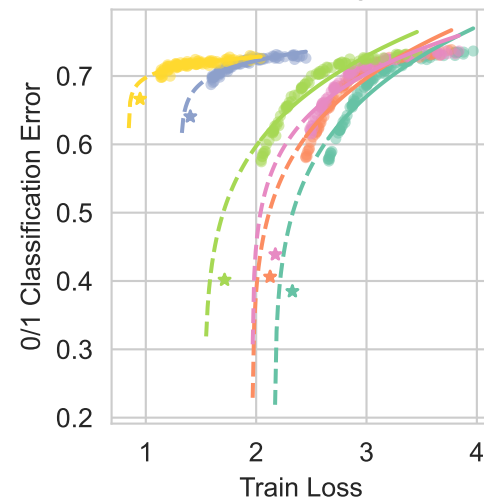

Openbook Qa

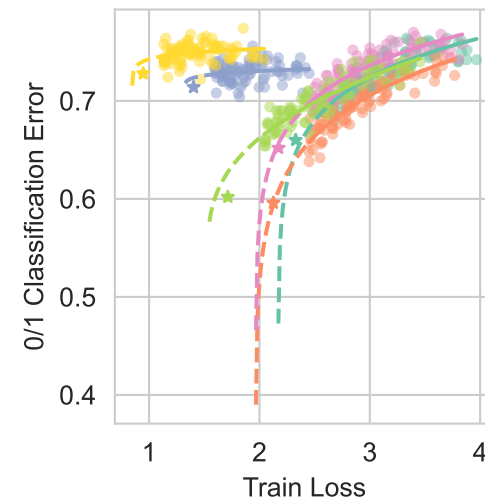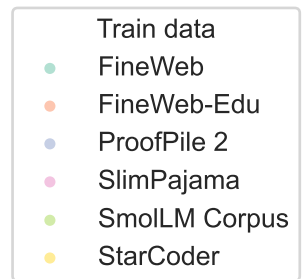

Piqa

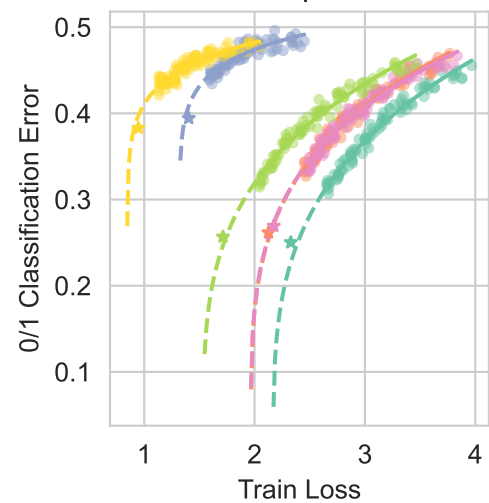

SciQ

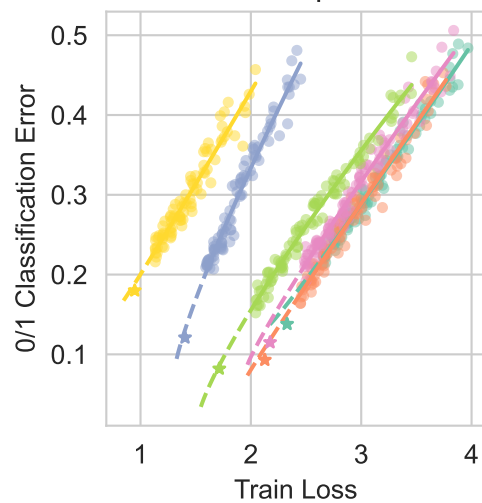

Winogrande

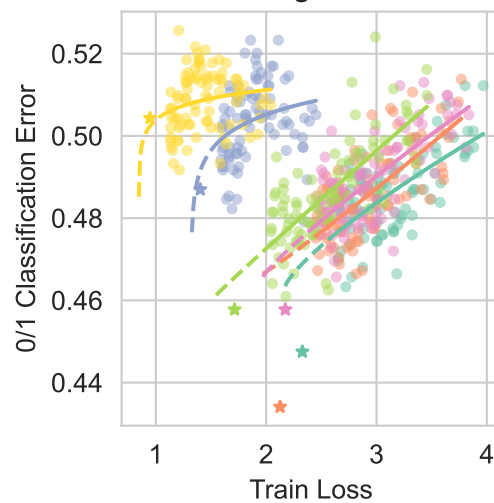

OLMo Suite

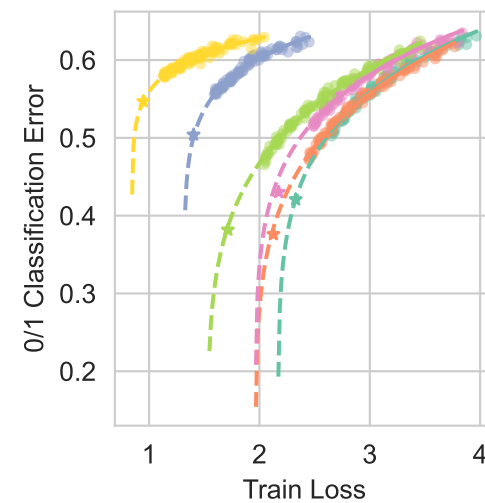

Supplement: supplementary_material [file attachment]

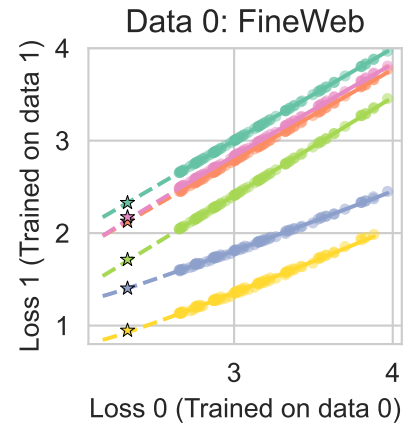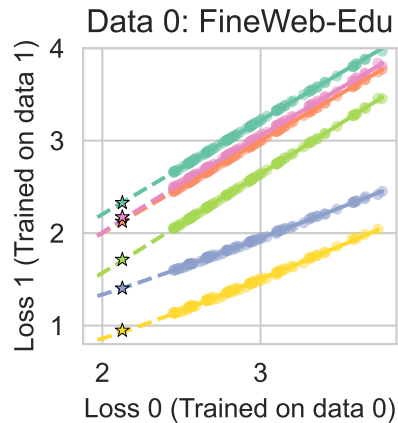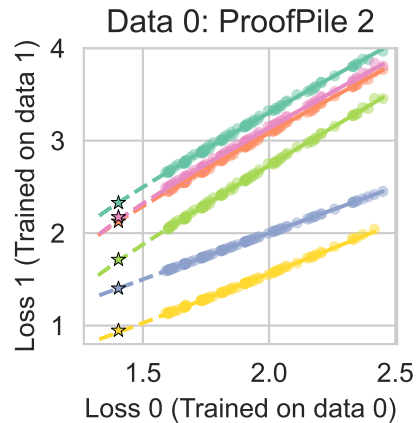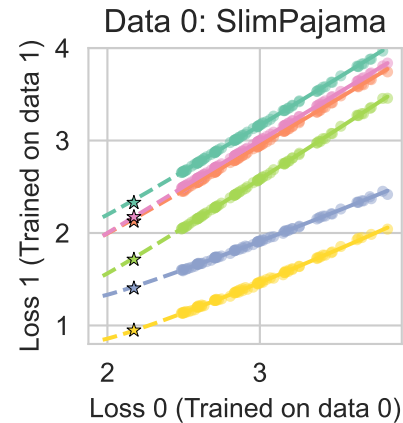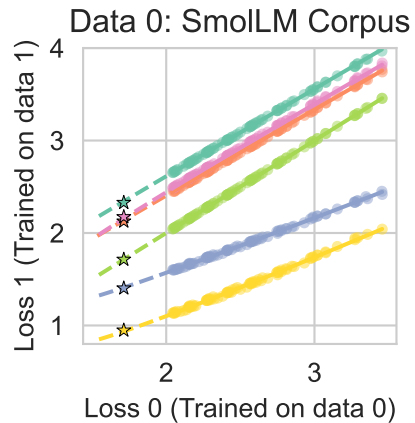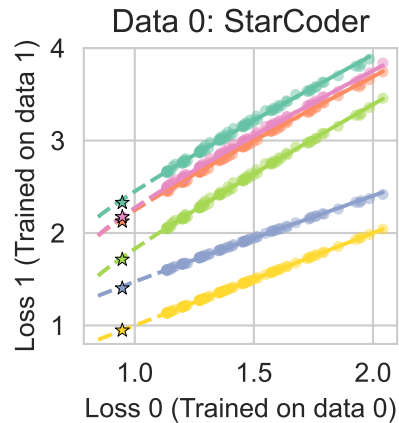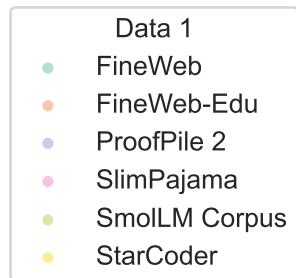

Supplement: supplementary_material [file attachment]

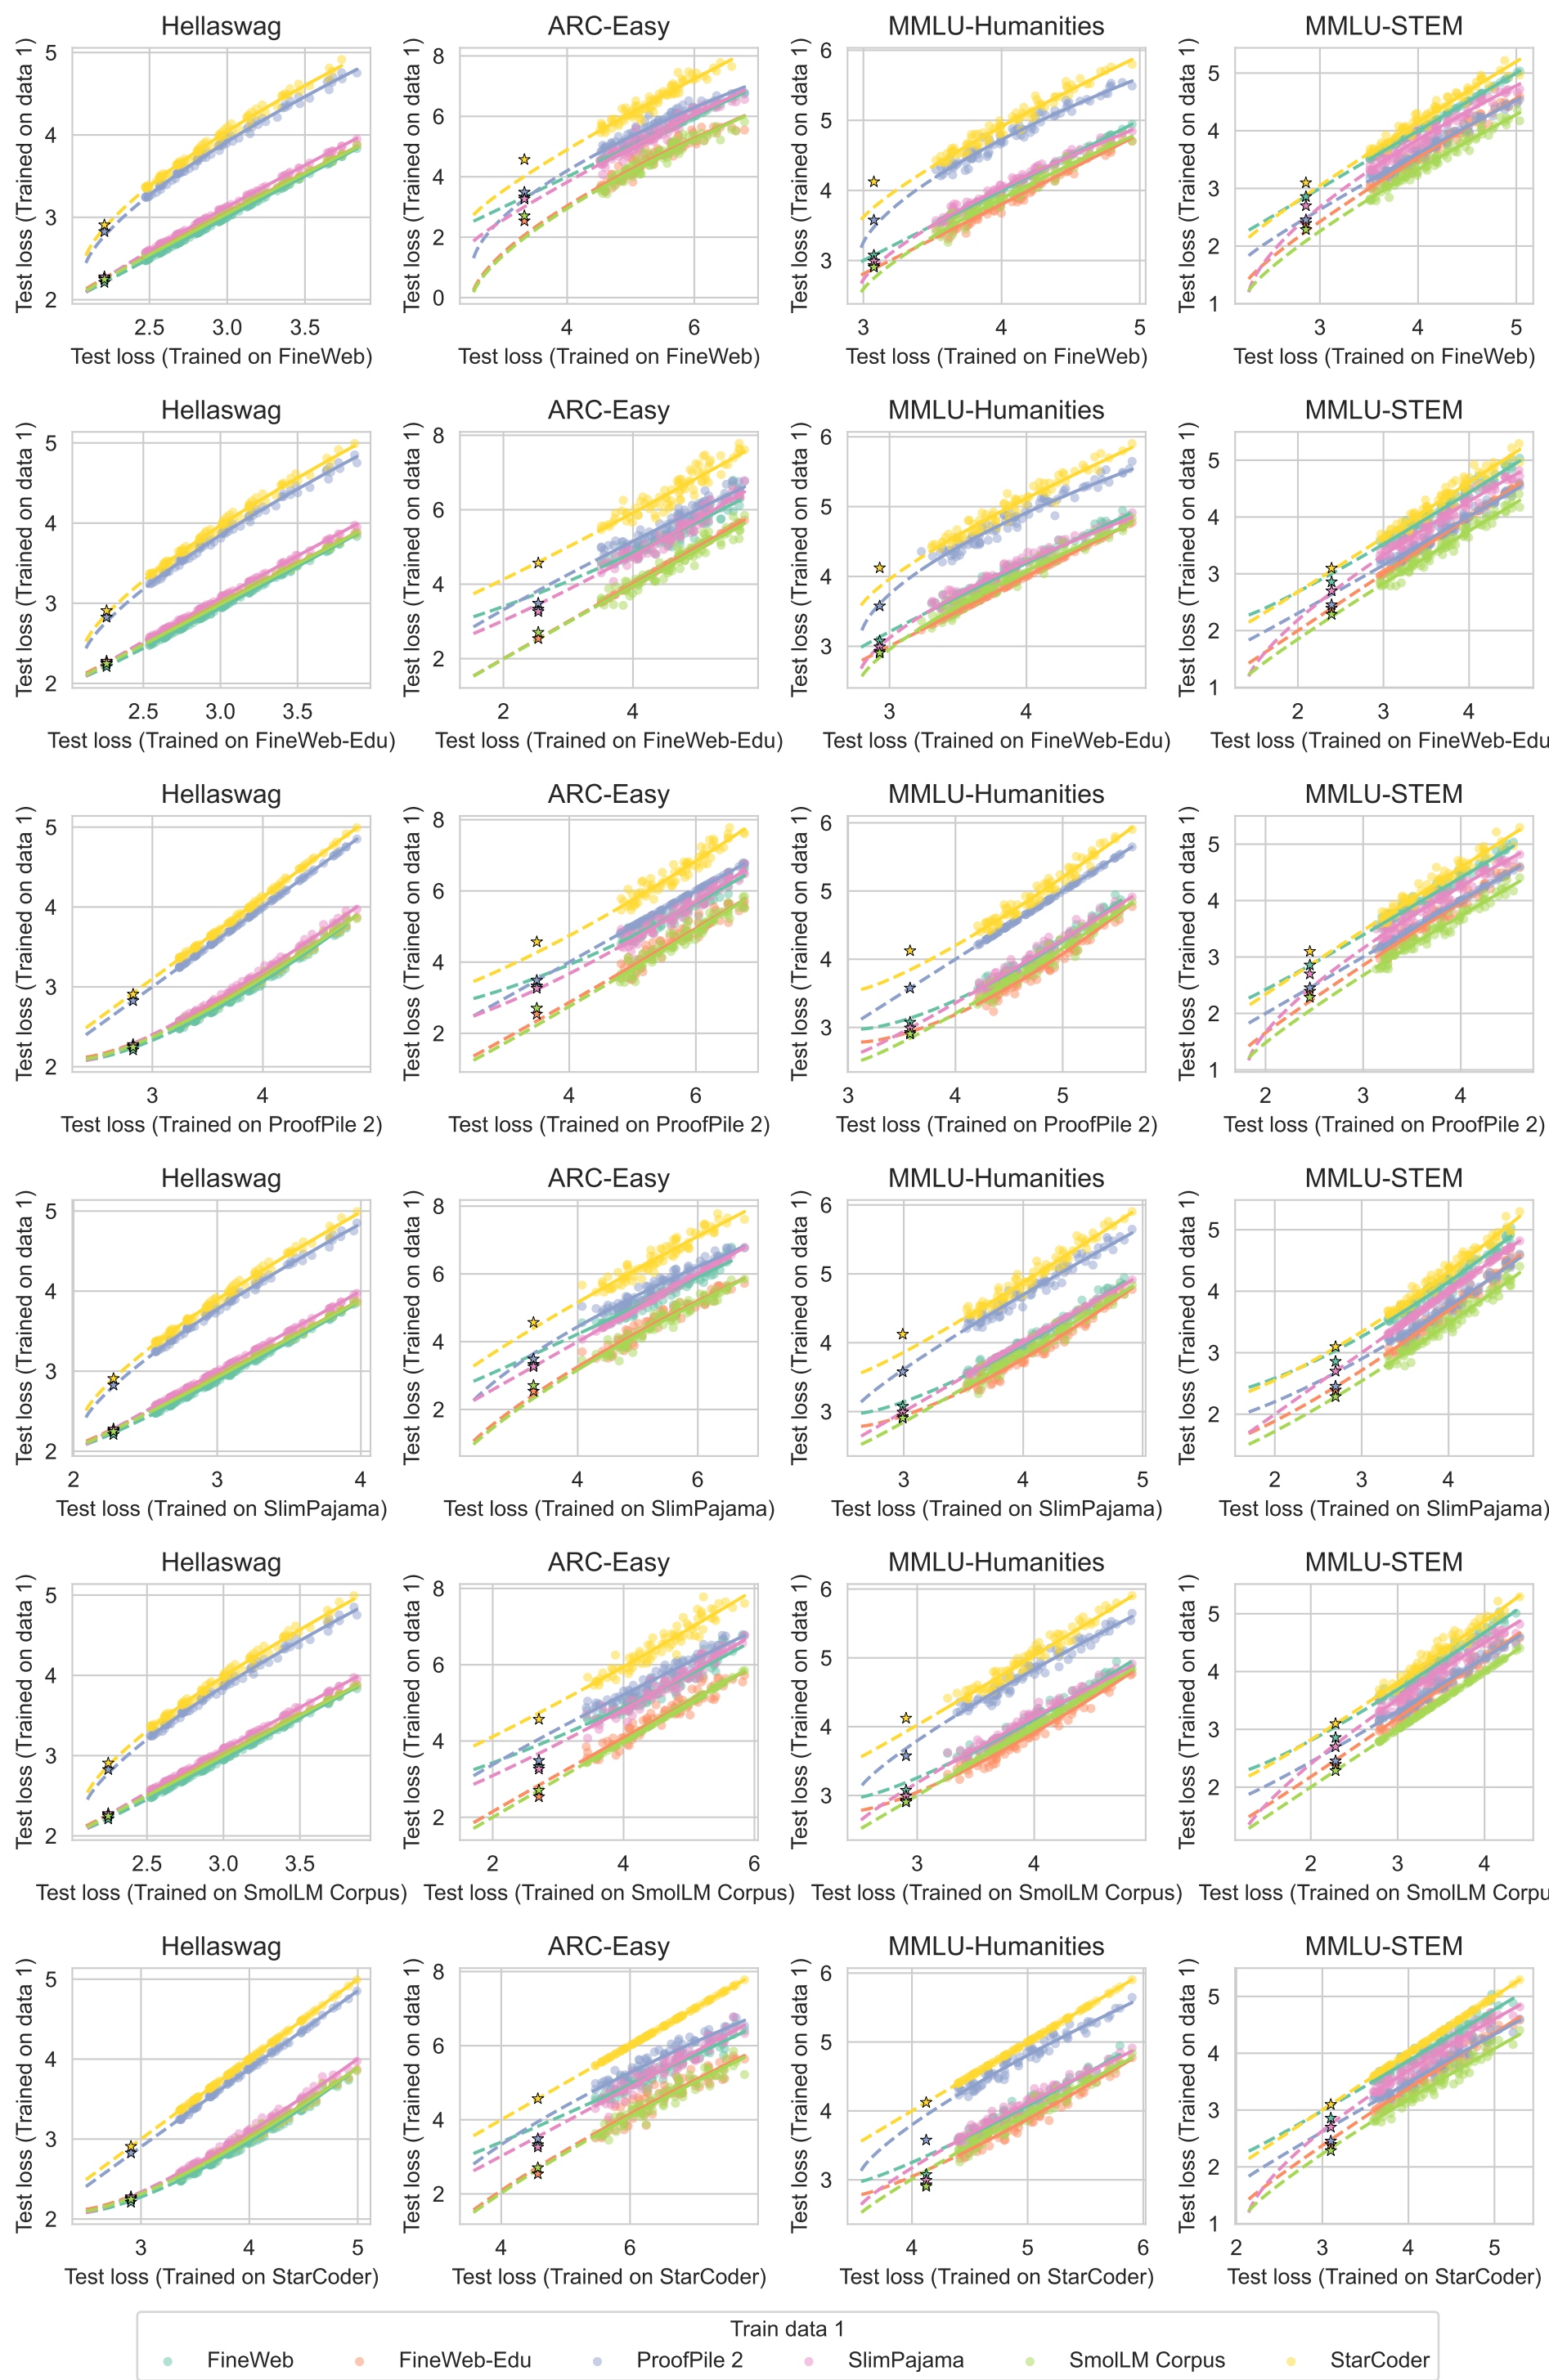

Supplement: supplementary_material [file attachment]

FineWeb-Edu Train

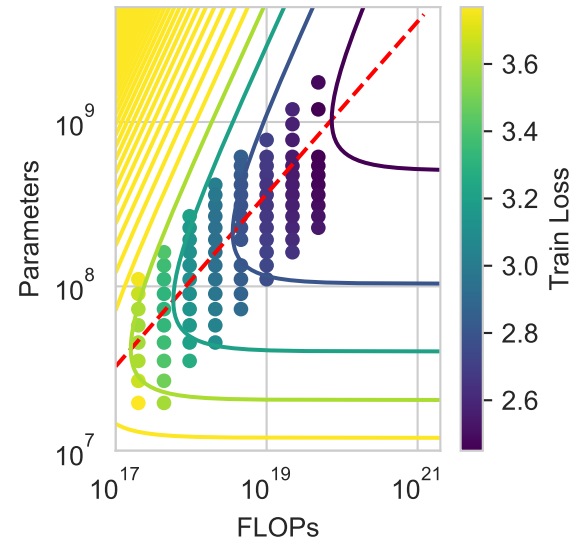

+

Train-to-Train

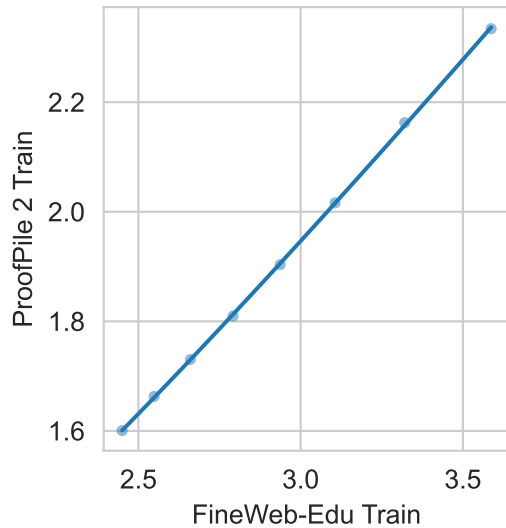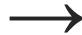

ProofPile 2 Train

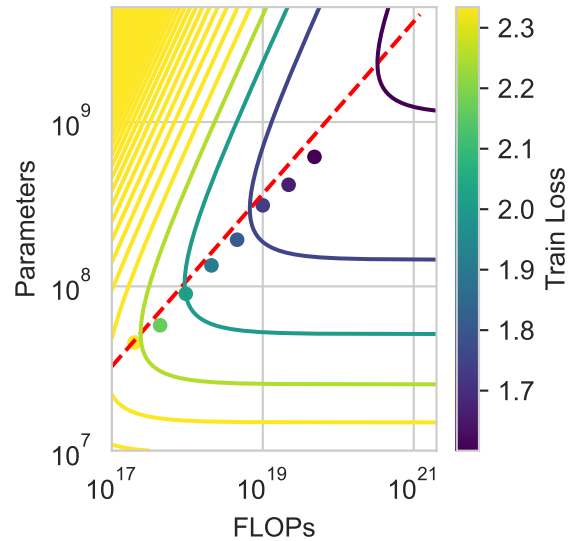

Supplement: supplementary_material [file attachment]

General Train-to-Test

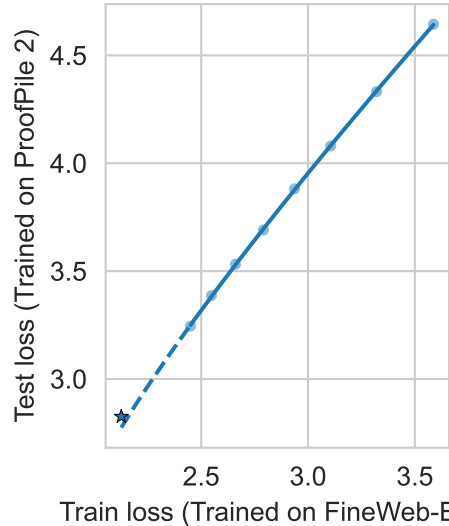

Test-to-Test

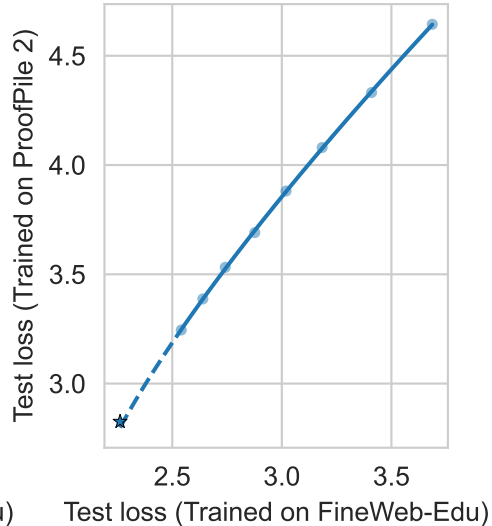

Baseline: FLOPs-to-loss

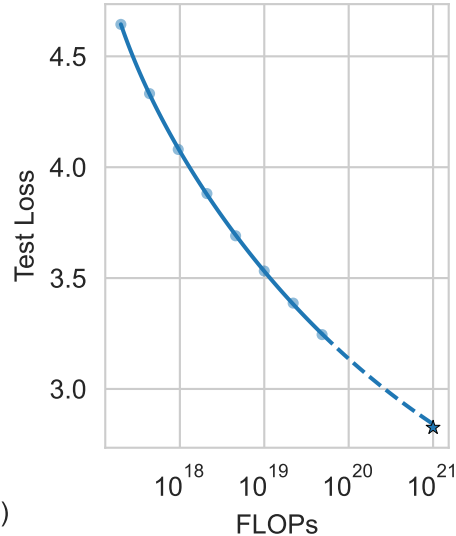

Baseline: independent scaling

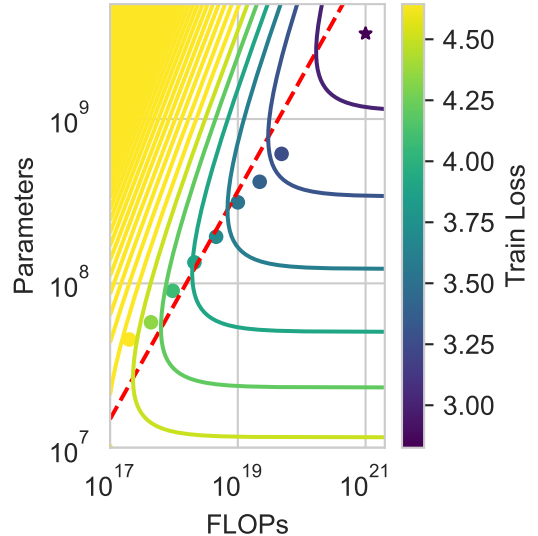

Supplement: supplementary_material [file attachment]

Mmlu Humanities

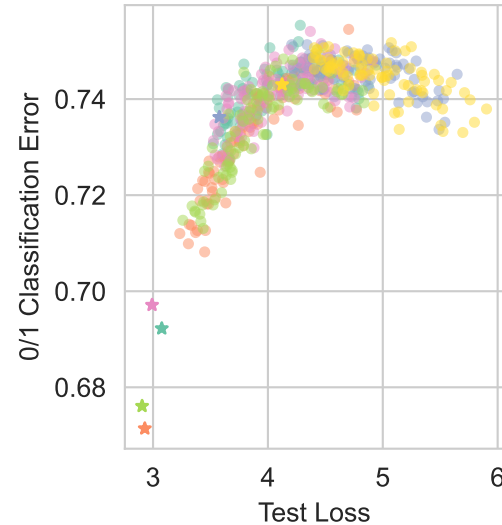

Mmlu Other

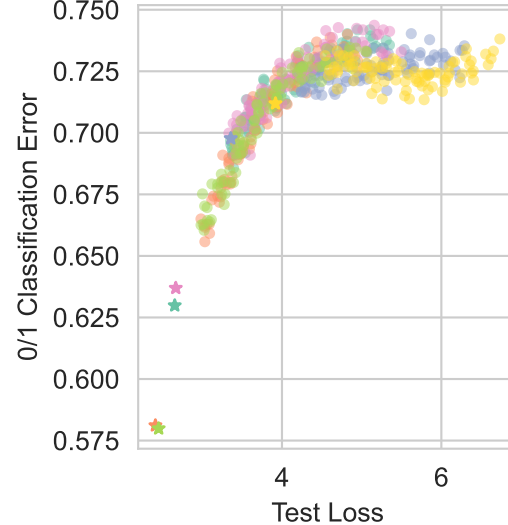

Mmlu Social Sciences

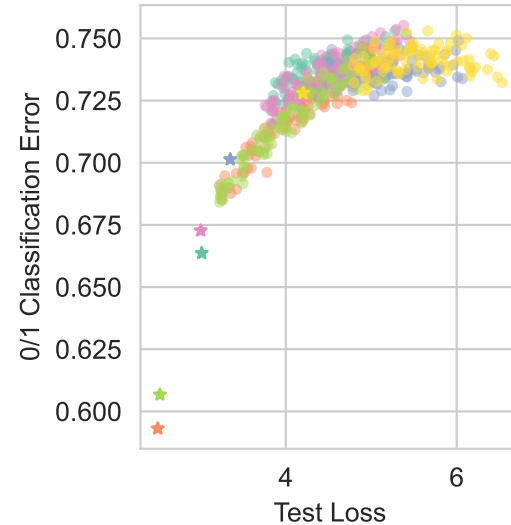

Mmlu Stem

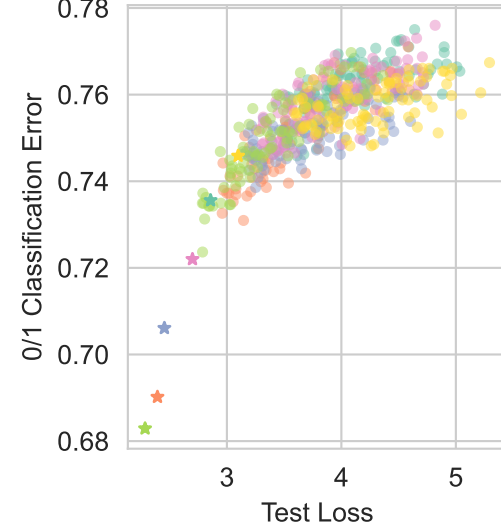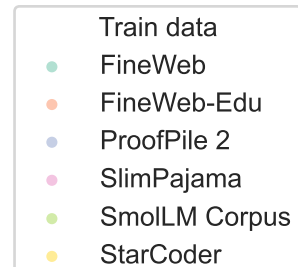

Supplement: supplementary_material [file attachment]

Arc Challenge

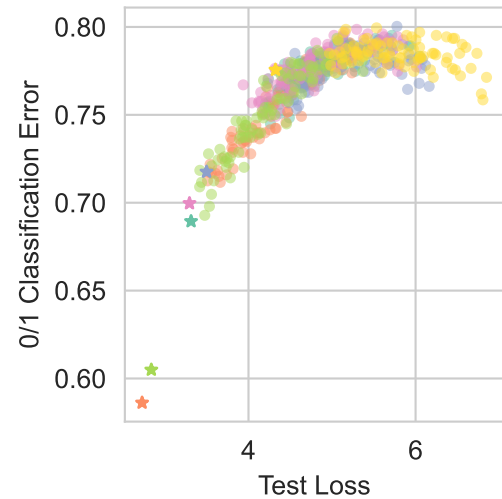

Arc Easy

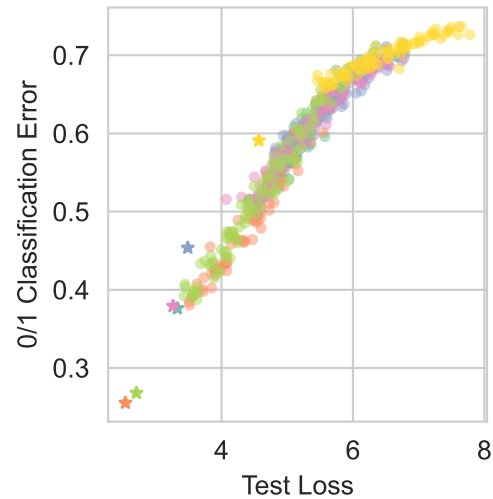

Hellaswag

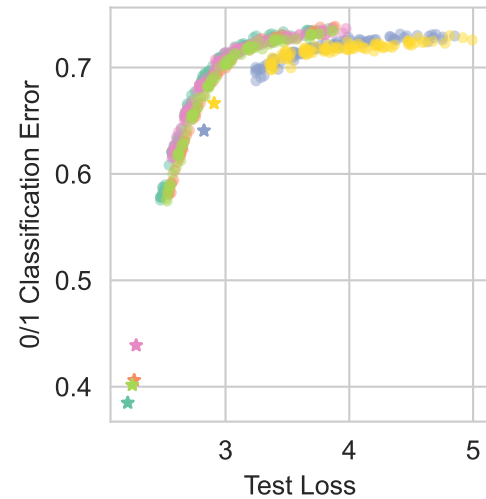

Openbook Qa

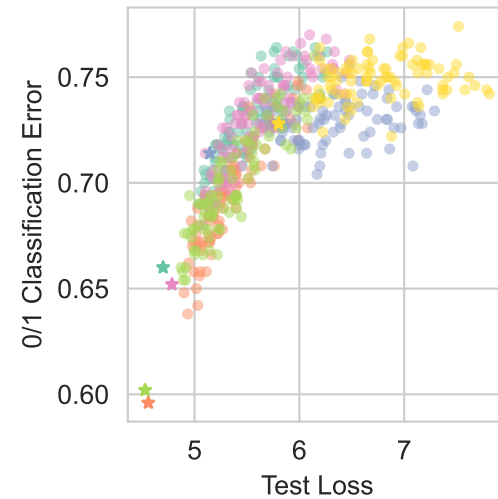

Piqa

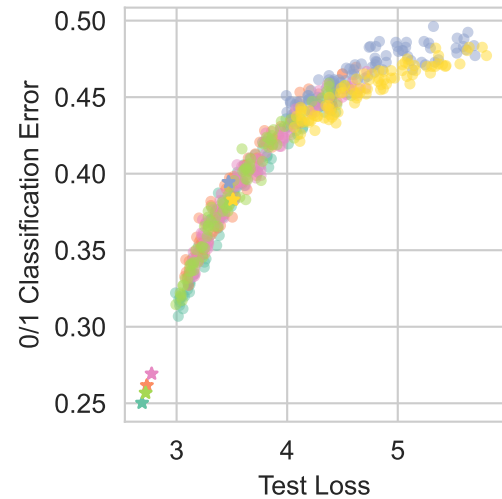

SciQ

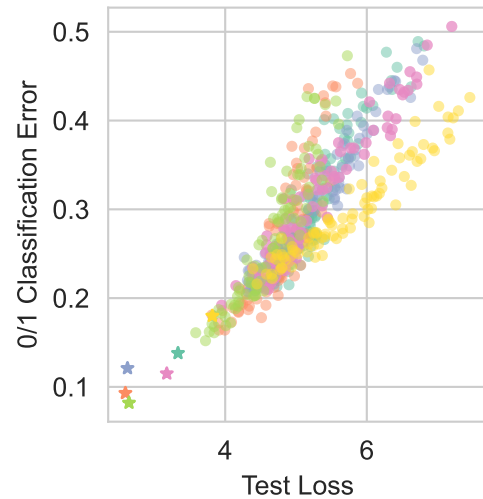

Winogrande

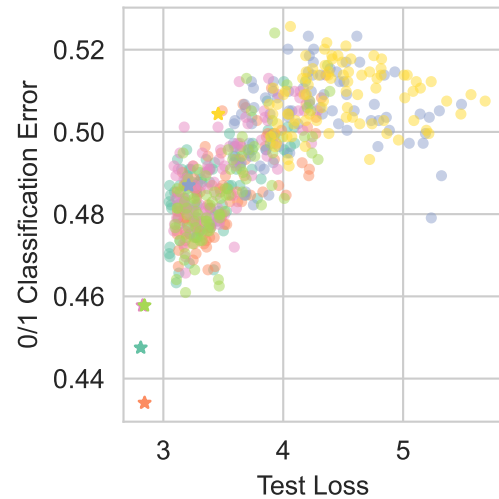

OLMo Suite

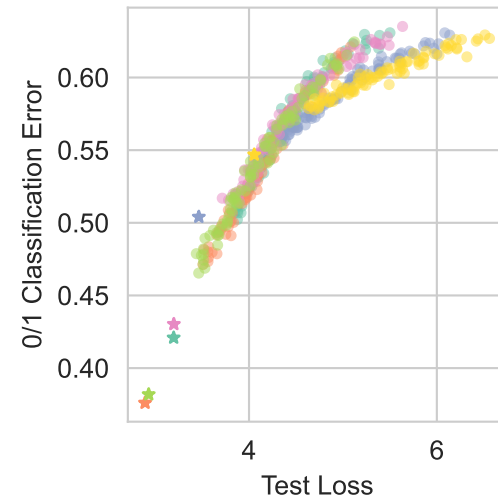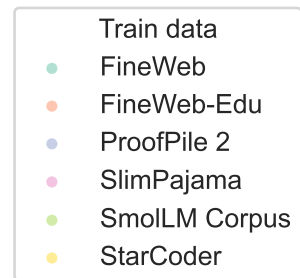

Supplement: supplementary_material [file attachment]

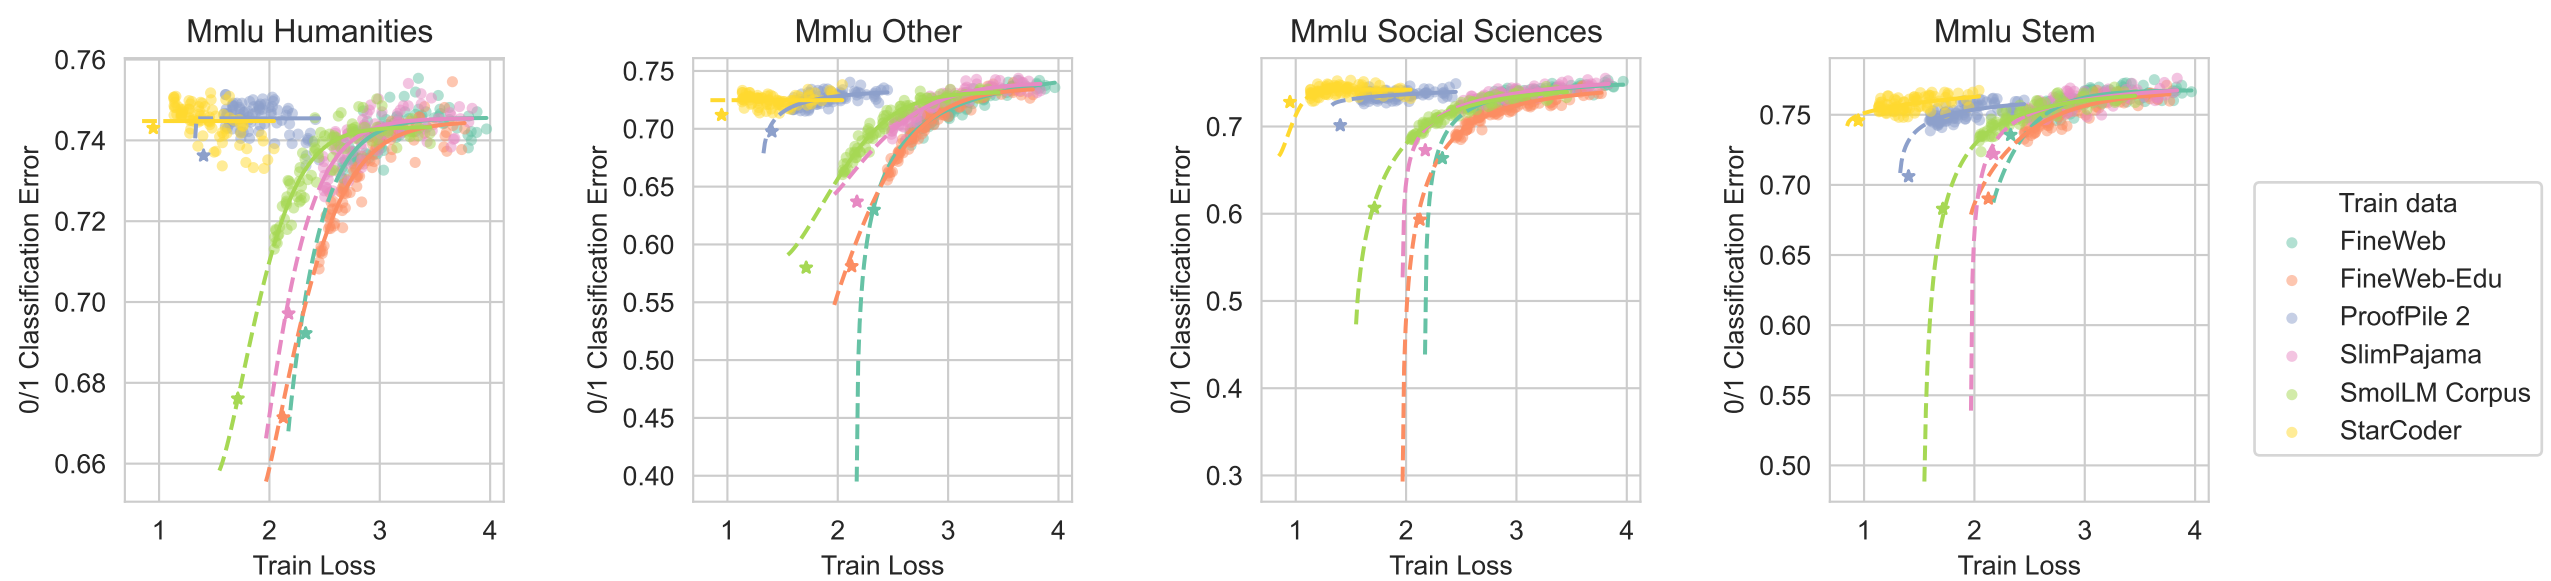

Supplement: supplementary_material [file attachment]

Train-to-Train (Join)

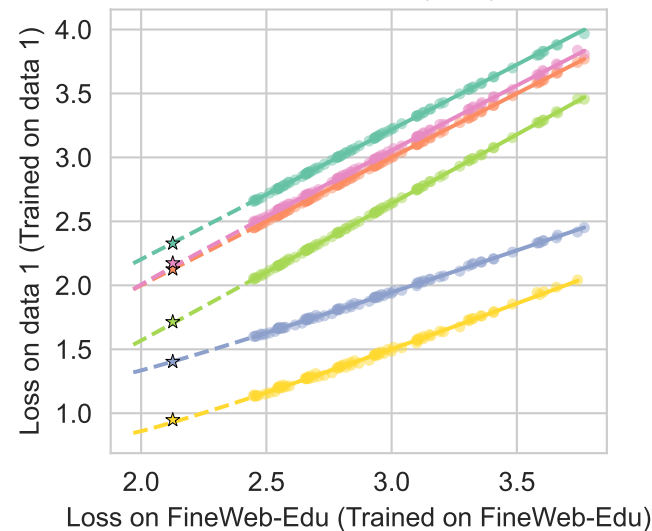

Test-to-Test (Join)

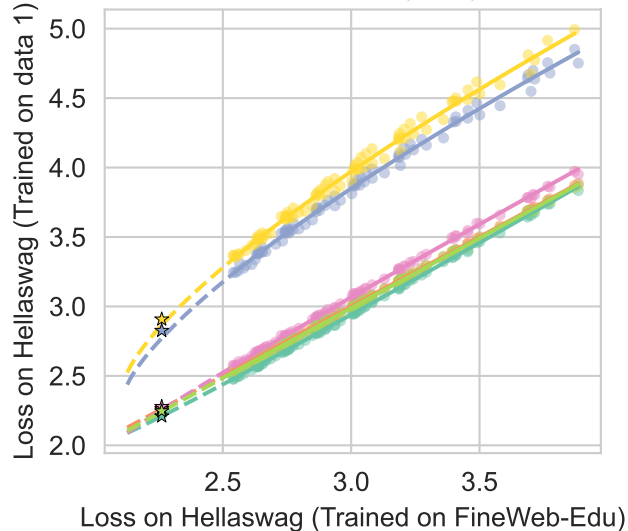

Train-to-Test (Transfer)

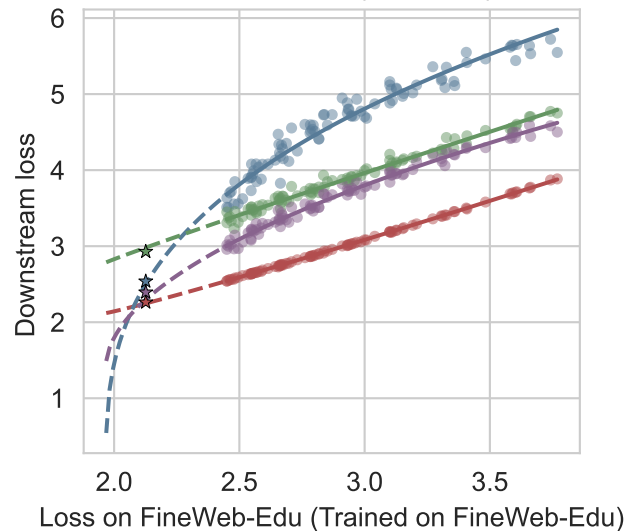

Data 1

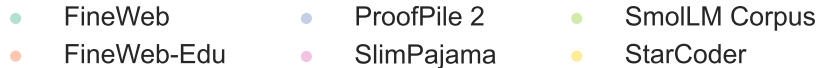

Downstream Data

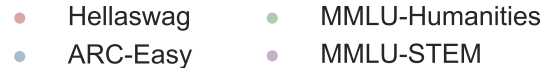

Supplement: supplementary_material [file attachment]

Mmlu Humanities

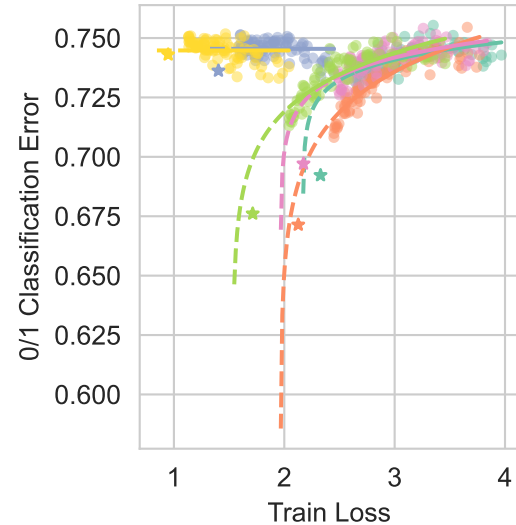

Mmlu Other

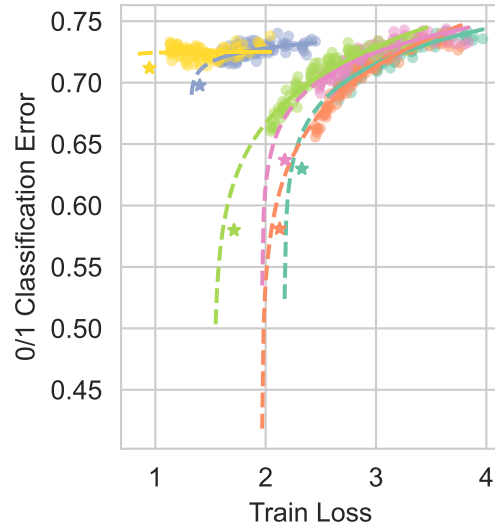

Mmlu Social Sciences

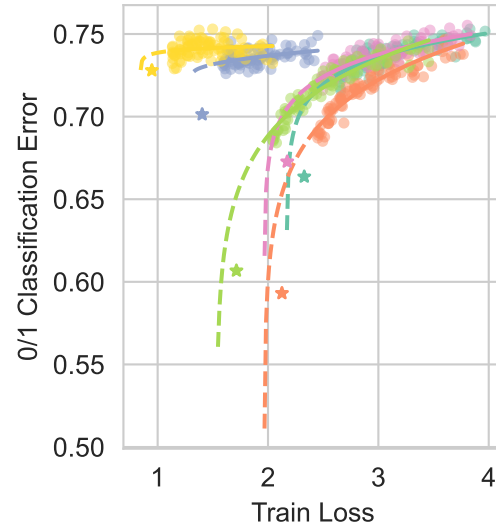

Mmlu Stem

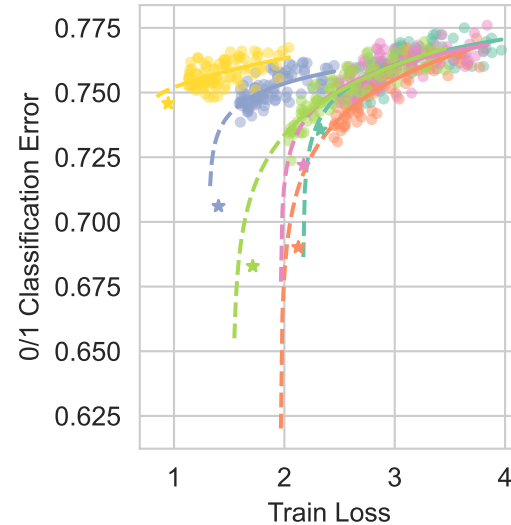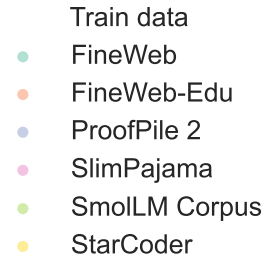

Supplement: supplementary_material [file attachment]

SmolLM Corpus

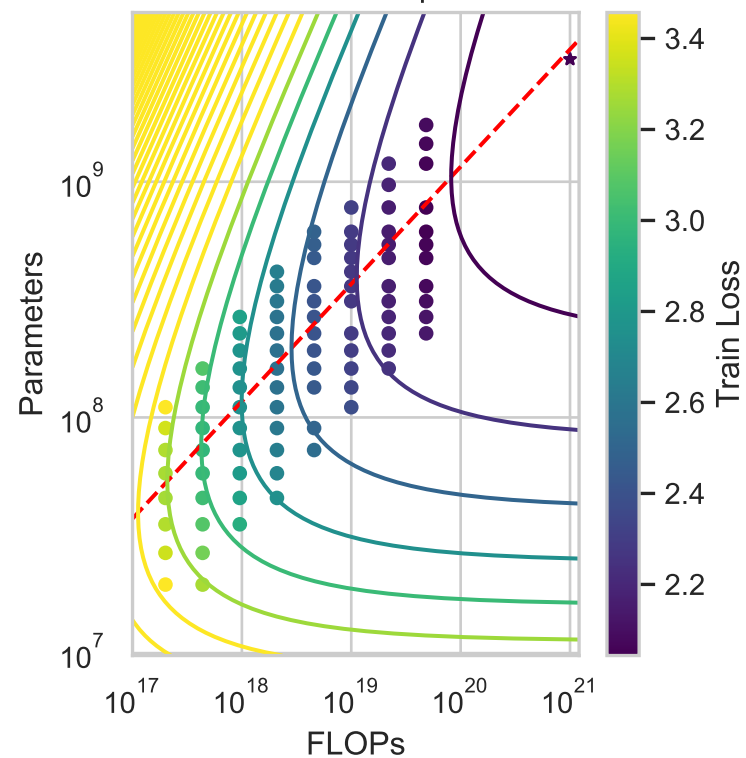

FineWeb-Edu

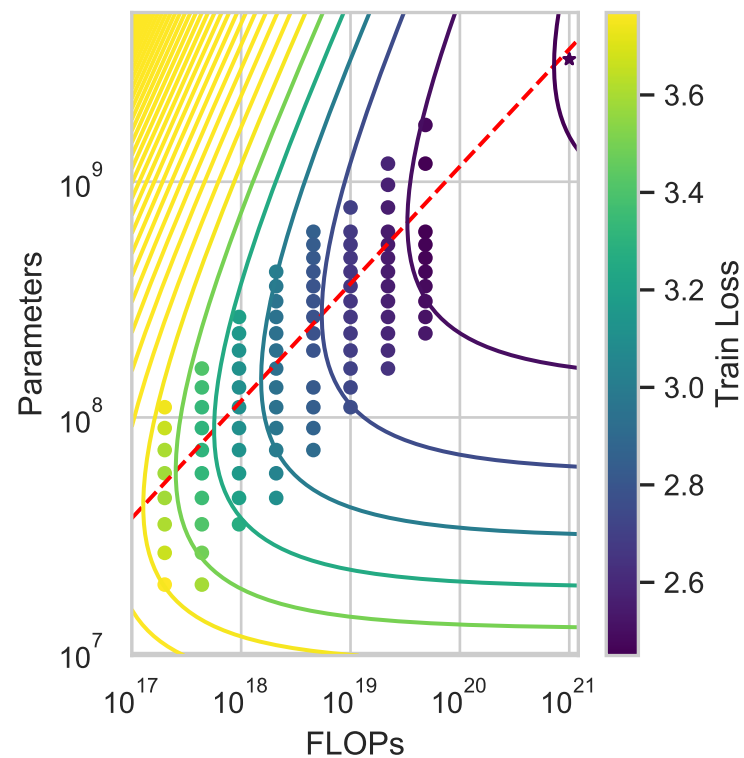

SlimPajama

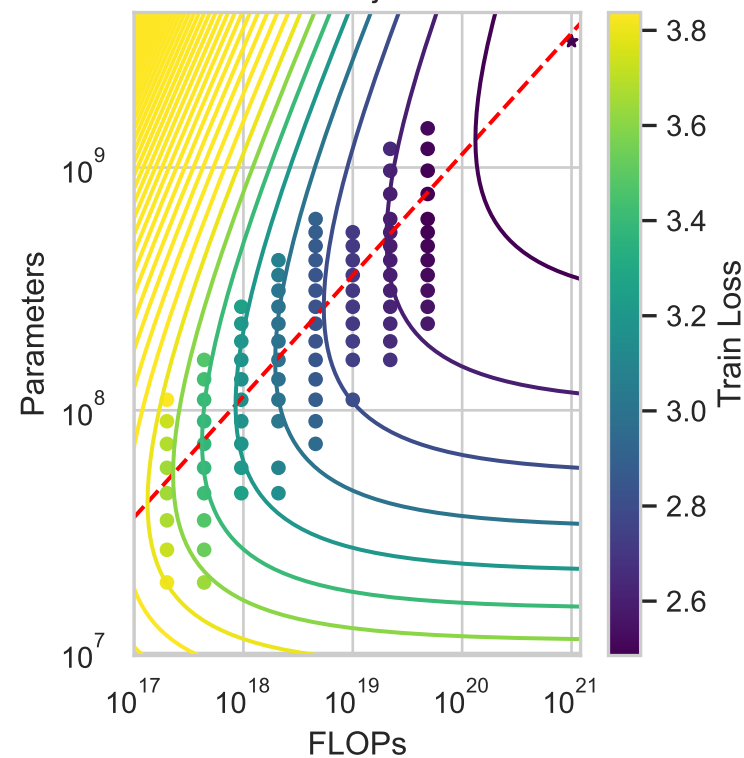

FineWeb

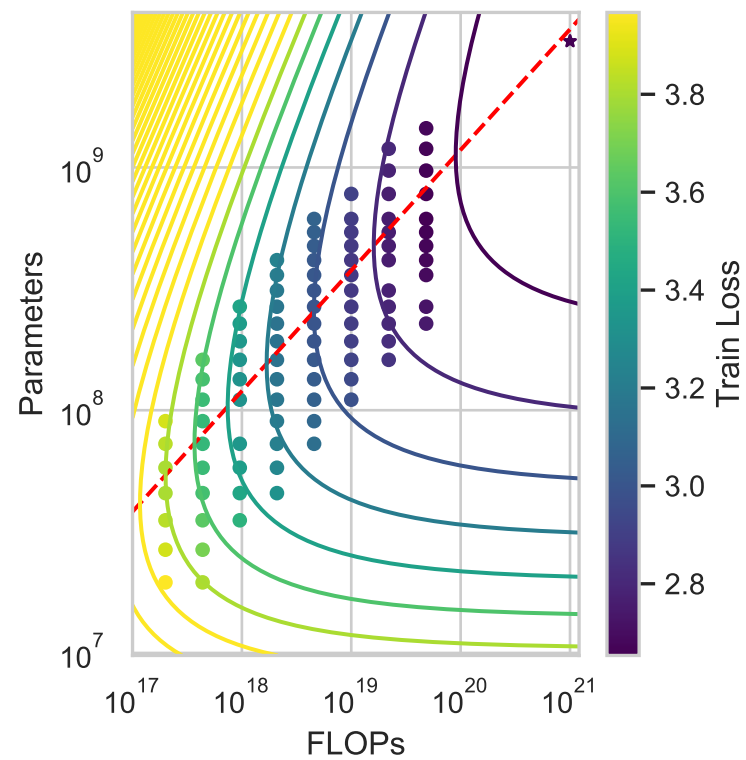

ProofPile 2

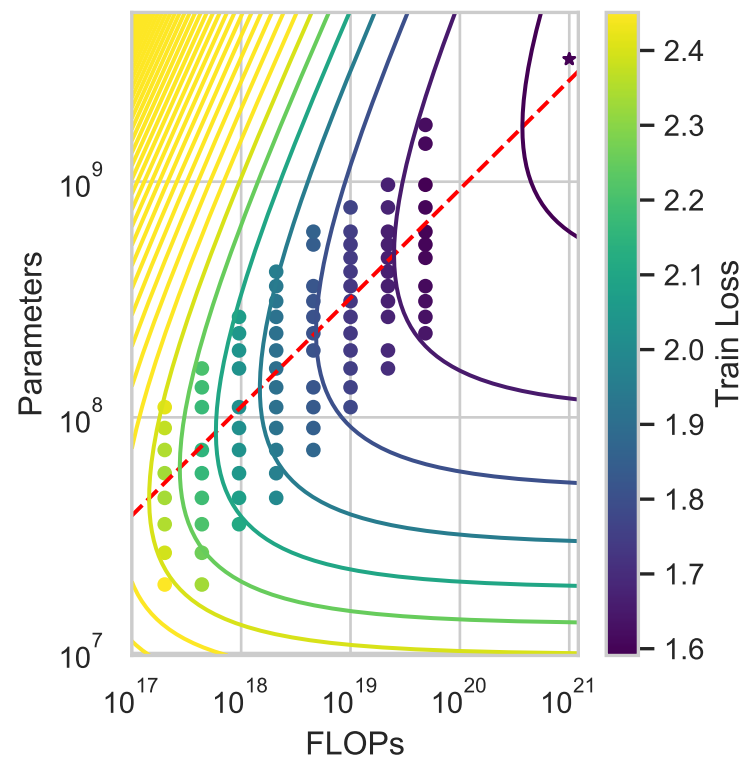

StarCoder

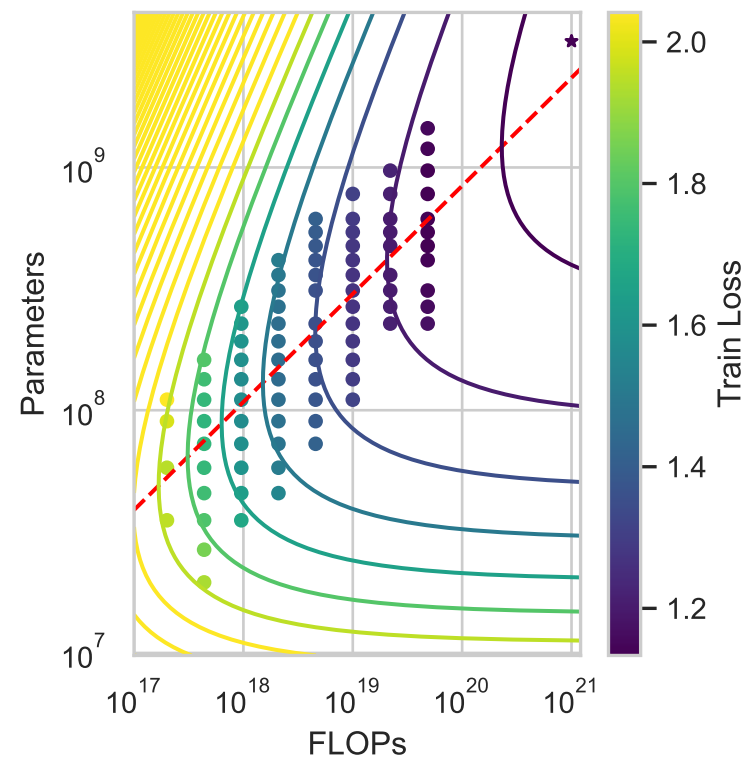

Supplement: supplementary_material [file attachment]

Baseline (ProofPile 2 Train)

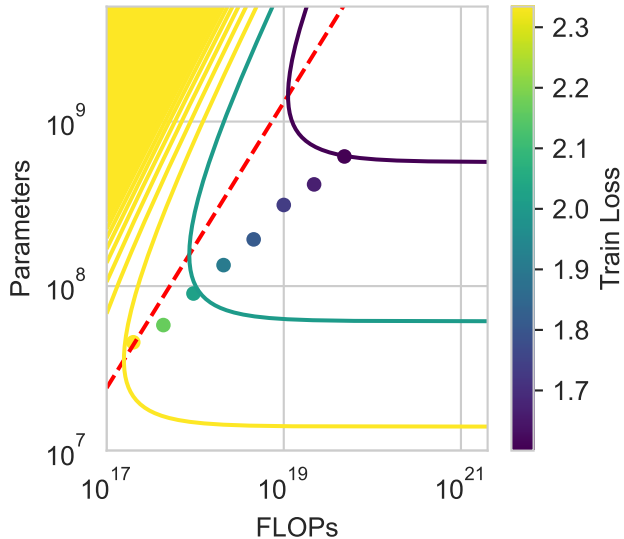

Skyline (ProofPile 2 Train)

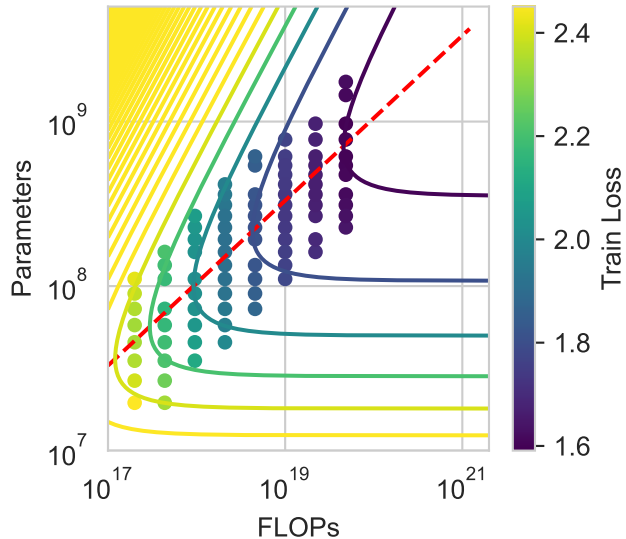

Supplement: supplementary_material [file attachment]

Arc Challenge

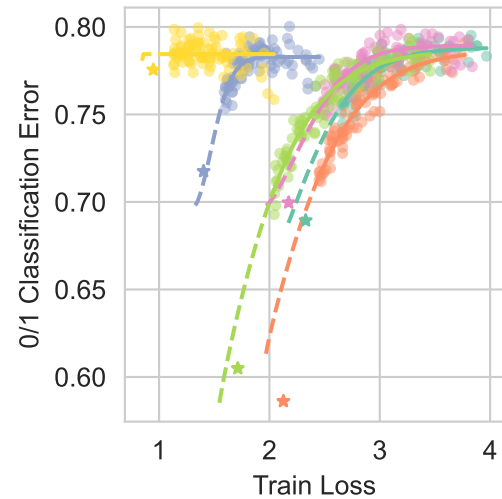

Arc Easy

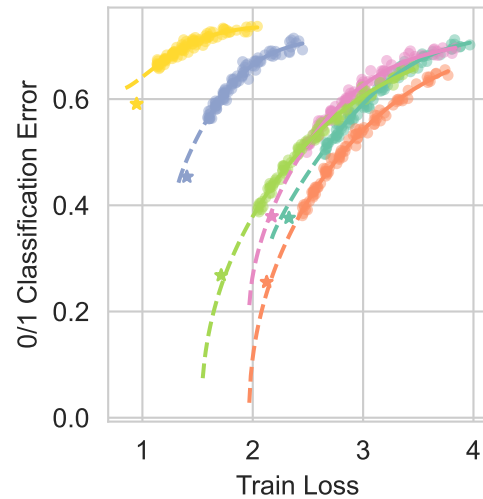

Hellaswag

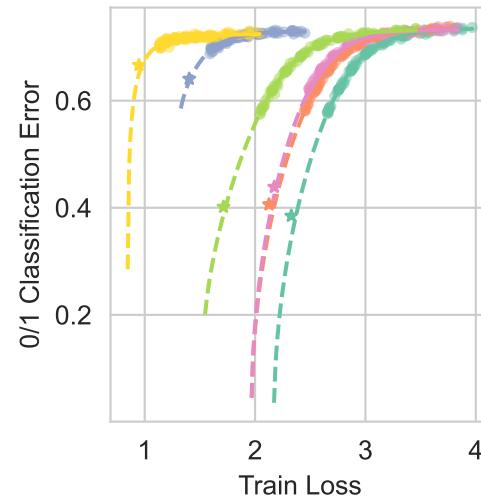

Openbook Qa

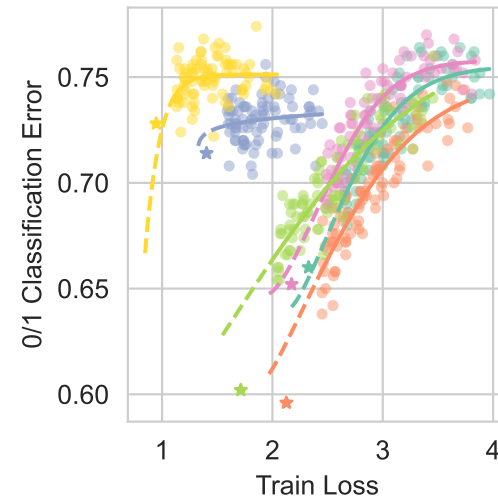

Piqa

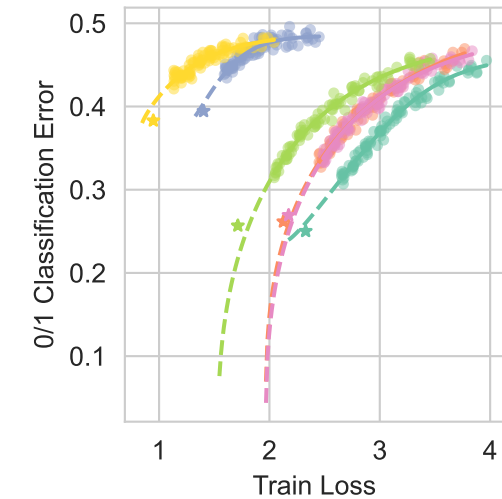

SciQ

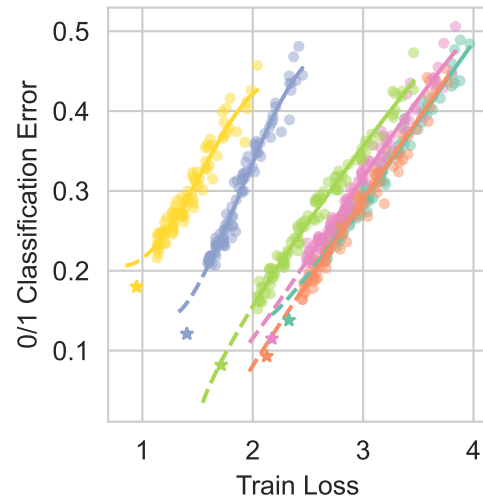

Winogrande

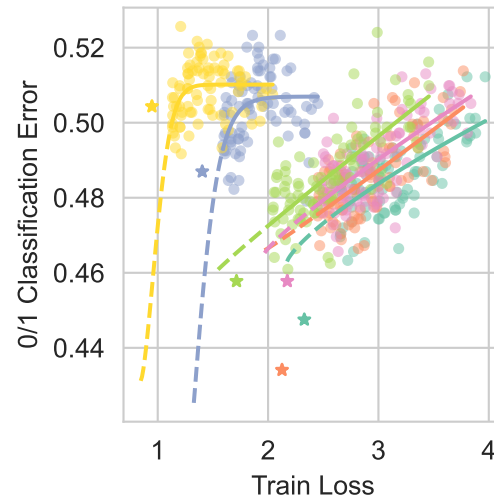

OLMo Suite

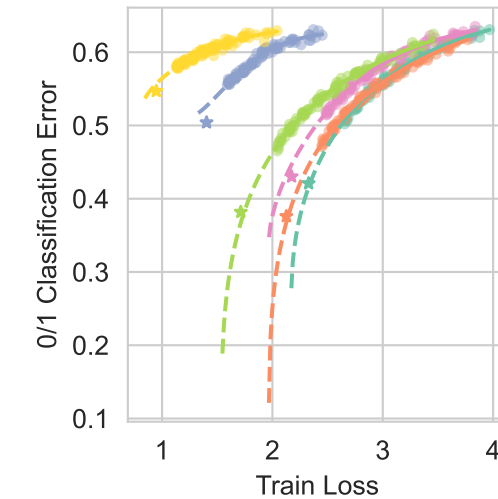

Supplement: supplementary_material [file attachment]
